# Supplementary material
Source: PubMed Central journal article supplement (PMC3641378)
Supplement: ejhg2012201x1.pdf [file ejhg2012201x1.pdf]

## Supplementary data

**Figure S1** – Mutational and clinical items in MTM1-LOVD database, an entry example

### A

| Patient data (#0012336) |                                                                                                                                                                                                     |
|-------------------------|-----------------------------------------------------------------------------------------------------------------------------------------------------------------------------------------------------|
| Patient ID              | ██████████                                                                                                                                                                                          |
| Disease                 | myopathy, myotubular, type 1, X-linked (XL-MTM1)                                                                                                                                                    |
| Phenotype additional    | Mild                                                                                                                                                                                                |
| Reference               | <a href="#">Portugal:Porto</a>                                                                                                                                                                      |
| Remarks                 | -                                                                                                                                                                                                   |
| # reported              | 1                                                                                                                                                                                                   |
| Geographic origin       | Portugal                                                                                                                                                                                            |
| Ethnic origin           | -                                                                                                                                                                                                   |
| Gender                  | F                                                                                                                                                                                                   |
| Inheritance             | isolated (sporadic)                                                                                                                                                                                 |
| Consanguinity           | -                                                                                                                                                                                                   |
| CK level                | -                                                                                                                                                                                                   |
| MR-IQ                   | normal                                                                                                                                                                                              |
| FVC                     | -                                                                                                                                                                                                   |
| Age diagnosis           | 30y                                                                                                                                                                                                 |
| Age onset               | 4-6y                                                                                                                                                                                                |
| Phenotype onset         | Frequent falls                                                                                                                                                                                      |
| Motor_ability           | Walks (only in flat surfaces)                                                                                                                                                                       |
| Wheelchair_dependent    | -                                                                                                                                                                                                   |
| Age at death            | >32y                                                                                                                                                                                                |
| Protein data            | -                                                                                                                                                                                                   |
| Remarks (non public)    | Slowly progressive proximal weakness (especially in lower limbs); severe difficulty rising up from the floor and climbing stairs; moderate difficulty rising up from sitting. Positive Gowers sign. |

### B

| Variant data            |                                                                                                                                   |
|-------------------------|-----------------------------------------------------------------------------------------------------------------------------------|
| Allele                  | Unknown                                                                                                                           |
| Reported pathogenicity  | Pathogenic                                                                                                                        |
| Concluded pathogenicity | Unknown                                                                                                                           |
| Exon                    | 12                                                                                                                                |
| DNA change              | c.1262G>A (View in <a href="#">UCSC Genome Browser</a> , <a href="#">Ensembl</a> )                                                |
| Var_pub_as              | -                                                                                                                                 |
| RNA change              | r.(?)                                                                                                                             |
| Protein change          | p.(Arg421Gln)                                                                                                                     |
| DB-ID                   | MTM1_00174                                                                                                                        |
| Variant remarks         | conserved residue (C. elegans and/or S. cerevisiae R); functional effect (disruption of ligand binding site); de novo, in patient |
| PolyPhen                | 1.000                                                                                                                             |
| Genet_ori               | de novo                                                                                                                           |
| Reference               | -                                                                                                                                 |
| Template                | DNA                                                                                                                               |
| Technique               | SEQ                                                                                                                               |
| Frequency               | -                                                                                                                                 |
| RE-site                 | -                                                                                                                                 |
| DNA a                   | -                                                                                                                                 |

**Legend:** Each database entry is subdivided into two tables: patient/clinical items (A) shared among the different LSDBs in the Leiden Muscular Dystrophy pages, and variant data (B).
