# Supplementary material
Source: PubMed Central journal article supplement (PMC3641378)
Supplement: ejhg2012201x4.pdf [file ejhg2012201x4.pdf]

## Supplementary data

**Table S2** – *MTM1* probes in P309-A1 MLPA kit

| Probe name   | Product length (bp) | Probe location | Ligation site (a)    | Partial sequence (b)       |
|--------------|---------------------|----------------|----------------------|----------------------------|
| 12646-L14952 | 189                 | Intron 1       | c.-11+81_ -11+82     | GAGGAGGAAGTT-GGGACTCCTTG   |
| 12330-L13333 | 338                 | Intron 1       | c.-11+529_ -11+530   | GTTTCTGTGTCA-TACACGAGAGGT  |
| 10741-L12837 | 208                 | Exon 2         | c.-2_ -1             | TAGAGTTTCCAG-GATGGCTTCTGC  |
| 12647-L11339 | 135                 | Exon 3         | c.83_84              | AGATGGAGTCAA-TCGAGATCTCAC  |
| 10744-L11340 | 158                 | Exon 4         | c.178_179            | ATGGCCCCATTA-AGGGAAGAGTTT  |
| 12327-L13330 | 171                 | Exon 5         | c.271_272            | TGGGTGTGATCT-CGAGAATTGAAA  |
| 12650-L13723 | 274                 | Exon 6         | c.396_397            | AGCAGAAGAGAT-ATGTTTGAGATC  |
| 12328-L13331 | 256                 | Intron 7       | c.528+27_ 528+28     | CTATTGTCTGGT-ATGTGATGAACC  |
| 10748-L12835 | 177                 | Exon 8         | c.655_656            | GAGTTGCAACTT-TTAGGTCCCGAA  |
| 10749-L11345 | 327                 | Exon 9         | c.720_721            | ACGGTCATTGTG-CGTTGCAGTCAG  |
| 10750-L11346 | 213                 | Exon 10        | c.906_907            | GATGCATATCAT-AACGCCGA ACTT |
| 12648-L11347 | 139                 | Exon 11        | c.1106_1107          | TTCAGGGAAGAG-TTCAGTGCTTGT  |
| 12331-L13334 | 365                 | Exon 12        | c.1302_1303          | GATGCTGACCGT-TCTCCTATTTTT  |
| 12649-L13332 | 301                 | Intron 13      | c.1467+127_ 1467+128 | AGGAATTACATT-AAAGGTATGCAT  |
| 10754-L11350 | 387                 | Exon 14        | c.1616_1617          | GAATTACTACAT-TAGATGGAACCC  |
| 10755-L11351 | 310                 | Exon 15        | c.1703_1704          | CGACGAATACAT-AAAGCGGCTTGA  |

(a)- cDNA nucleotide position using reference sequence NM\_000252.2; (b)- 24 nucleotides neighboring the ligation site.

The information in this table originally derived from the SALSA MLPA KIT P309-A1 *MTM1* documentation (description version 01; 28-01-2009). We included exclusively the information of the probes that recognize *MTM1* sequences; in addition this kit also contains 11 reference probes for the X chromosome, 8 probes for *MTMRI* and 4 probes for other genes located in Xq28 (*IDS*, *FLNA* and *DKCI*).
