# Supplementary material
Source: PubMed Central journal article supplement (PMC3641378)
Supplement: ejhg2012201x5.pdf [file ejhg2012201x5.pdf]

## Supplementary data

Table S3 - Pathogenicity assessment of new missense variants

| Gene location | DNA mutation | Protein effect | Grantham distance (a) | PolyPhen V2 score (b) | Phylogenetic conservation (c) | Human Splice Finder (d) | Population screening (e) | Remarks                                             | Conclusion          |
|---------------|--------------|----------------|-----------------------|-----------------------|-------------------------------|-------------------------|--------------------------|-----------------------------------------------------|---------------------|
| Exon 5        | c.323G>A     | p.Gly108Asp    | 90                    | <u>0.998</u>          | <u>9/10</u> (y)               | -                       | -                        | -                                                   | Probably pathogenic |
| Exon 8        | c.595C>A     | p.Pro199Thr    | 38                    | <u>0.995</u>          | <u>10/10</u>                  | -                       | <u>0/180</u>             | other reported mutations affecting the same residue | Pathogenic          |
| Exon 8        | c.637C>T     | p.Leu213Phe    | 22                    | 0.523                 | <u>9/10</u> (ce)              | -                       | -                        | -                                                   | Probably pathogenic |
| Exon 8        | c.659G>C     | p.Arg220Thr    | 71                    | <u>1.000</u>          | <u>10/10</u>                  | -                       | -                        | -                                                   | Probably pathogenic |
| Exon 11       | c.1241T>C    | p.Phe414Ser    | <u>155</u>            | <u>0.998</u>          | <u>10/10</u>                  | -                       | <u>0/140</u>             | -                                                   | Pathogenic          |
| Exon 11       | c.1247A>G    | p.His416Arg    | 29                    | <u>1.000</u>          | <u>10/10</u>                  | NDSS (75.1%)            | -                        | disruption of ligand binding site                   | Probably pathogenic |
| Exon 14       | c.1600T>C    | p.Trp534Arg    | 101                   | <u>1.000</u>          | <u>10/10</u>                  | DSS: +2%                | -                        | -                                                   | Probably pathogenic |

Pathogenicity assessment was performed with the aid of the commercial software Alamut version 2.1 (Interactive Biosoftware, Rouen, France). Results corroborating pathogenicity are underlined. Variants described according to the reference sequence NM\_000252.2, using HGVS nomenclature guidelines.

(a) - Grantham's distance (Grantham, 1974), compares wild type and mutated aminoacids considering physical and chemical parameters (volume, weight, polarity, and carbon-composition); range of values: 0-215 (higher value indicates larger difference).

(b) - PolyPhen version 2 (Adzhubei *et al.*, 2010). This software attributes a score to the impact of substitutions on the structure and function of protein; range of values: 0-1.000 (higher value more likely to be pathogenic).

(c) - Phylogenetic conservation analysis: performed using an alignment of myotubularin's orthologues from 10 different species, 10/10 means conserved residue in all species; 9/10 means conserved except in one specie: yeast (*y*) or *C. elegans* (*ce*).

(d) - Impact of variants on splice-sites scores using the Human Splice Finder (Desmet *et al.*, 2009); NDSS - new donor splice site; DSS - donor splice site.

(e) - Population screening performed in ethnically matched controls, N/Nt - indicates the number of control chromosomes with variant / total number of chromosomes tested.

#### References:

Grantham, R. Amino acid difference formula to help explain protein evolution. *Science*. 1974; 185:862-4.

Adzhubei IA, Schmidt S, Peshkin L, et al. A method and server for predicting damaging missense mutations. *Nat Methods*. 2010; 7(4):248-9.

Desmet FO, Hamroun D, Lalande M, Collod-Bérout G, Claustres M, Bérout C. Human Splicing Finder: an online bioinformatics tool to predict splicing signals. *Nucleic Acids Res*. 2009; 37(9):e67.
